# Supplementary material for: The nitriding effect on the stability and mechanical properties of the iron titan phase: first-principles investigation
Source: Royal Society of Chemistry journal article supplement (doi:10.1039/d3cp03294a), 2023-01-01
Supplement: d3cp03294a1.pdf [file d3cp03294a1.pdf]

Supporting Information for

**Nitriding effect on the stability and mechanical properties of the Iron Titan phase: First-principles investigation**

A. D. Ishkildin<sup>1</sup>, A. A. Kistanov<sup>1,\*</sup>, A.A. Izosimov<sup>2</sup>, E. A. Korznikova<sup>1,3</sup>

<sup>1</sup>Research Laboratory for Metals and Alloys under Extreme Impacts, Ufa University of Science and Technology, Ufa 450076, Russia

<sup>2</sup>Bashkir State Medical University, Ufa 450077 Russia

<sup>3</sup>Institute for Metals Superplasticity Problems, Ufa 450001, Russia

\*Corresponding author: [andrei.kistanov.ufa@gmail.com](mailto:andrei.kistanov.ufa@gmail.com)

\*Corresponding author: [andrei.kistanov.ufa@gmail.com](mailto:andrei.kistanov.ufa@gmail.com)

**Table S1.** The elastic constants of FeTi, where X is the concentration of the nitrogen (\* - clustered nitrogen).

| $C_{ij}$ , GPa | X=0%   | X=1.8% | X=3.7% | X=5.5% | X=7.4% | X=3.7%* | X=5.5%* | X=7.4%* |
|----------------|--------|--------|--------|--------|--------|---------|---------|---------|
| $C_{11}$       | 434.04 | 423.19 | 405.61 | 424.74 | 369.06 | 411.61  | 415.53  | 382.19  |
| $C_{12}$       | 88.83  | 97.12  | 105.45 | 96.35  | 115.37 | 100.05  | 93.16   | 114.93  |
| $C_{13}$       | 88.83  | 94.20  | 103.58 | 80.05  | 62.81  | 78.04   | 87.57   | 114.80  |
| $C_{21}$       | 88.83  | 97.12  | 105.45 | 96.35  | 115.37 | 100.05  | 93.16   | 114.93  |
| $C_{22}$       | 434.03 | 411.64 | 386.79 | 407.25 | 373.28 | 401.98  | 416.37  | 380.99  |
| $C_{23}$       | 88.83  | 97.11  | 105.47 | 97.07  | 118.97 | 100.15  | 95.11   | 107.95  |
| $C_{31}$       | 88.83  | 94.20  | 103.58 | 80.05  | 62.81  | 78.04   | 87.57   | 114.80  |
| $C_{32}$       | 88.83  | 97.11  | 105.47 | 97.07  | 118.97 | 100.15  | 95.11   | 107.95  |
| $C_{33}$       | 434.03 | 423.18 | 405.64 | 423.01 | 365.90 | 411.52  | 409.13  | 381.03  |
| $C_{44}$       | 55.73  | 57.44  | 62.02  | 61.68  | 62.29  | 58.36   | 58.69   | 71.13   |
| $C_{55}$       | 55.53  | 59.20  | 65.06  | 64.23  | 64.18  | 59.18   | 60.49   | 73.24   |
| $C_{66}$       | 55.52  | 61.37  | 69.92  | 70.48  | 70.64  | 63.31   | 62.71   | 72.84   |

**Table S2.**  $K_V$  and  $K_R$  bulk moduli and  $G_V$  and  $G_R$  shear moduli of nitrogen-containing TiFe.

|                        | $K_V$ , GPa             | $K_R$ , GPa | $G_V$ , GPa | $G_R$ , GPa |
|------------------------|-------------------------|-------------|-------------|-------------|
|                        | Uniformly distributed N |             |             |             |
| FeTi                   | 203.90                  | 203.90      | 102.36      | 76.207      |
| FeTi-N <sub>1.8%</sub> | 203.88                  | 203.86      | 100.24      | 79.40       |
| FeTi-N <sub>3.7%</sub> | 203.01                  | 202.93      | 98.305      | 84.192      |
| FeTi-N <sub>5.5%</sub> | 200.22                  | 200.22      | 104.71      | 85.869      |
| FeTi-N <sub>7.4%</sub> | 189.18                  | 187.95      | 93.496      | 81.984      |
|                        | Clustered N             |             |             |             |
| FeTi-N <sub>3.7%</sub> | 197.96                  | 197.92      | 99.296      | 79.926      |
| FeTi-N <sub>5.5%</sub> | 199.19                  | 199.12      | 100.73      | 80.647      |
| FeTi-N <sub>7.4%</sub> | 202.18                  | 202.16      | 97.212      | 88.774      |

**Table S3.** The calculated anisotropic index of nitrogen-containing FeTi.

|                        | $A^U$                   | $A_{B^i}$ , % | $A_{G^i}$ , % | $A_{\{100\}}$ | $A_{\{010\}}$ | $A_{\{001\}}$ |
|------------------------|-------------------------|---------------|---------------|---------------|---------------|---------------|
|                        | Uniformly distributed N |               |               |               |               |               |
| FeTi                   | 1.72                    | 0             | 14.6          | 0.32          | 0.32          | 0.32          |
| FeTi-N <sub>1.8%</sub> | 1.31                    | 0.0049        | 11.6          | 0.35          | 0.37          | 0.38          |
| FeTi-N <sub>3.7%</sub> | 0.84                    | 0.0197        | 7.7           | 0.41          | 0.44          | 0.48          |
| FeTi-N <sub>5.5%</sub> | 1.10                    | 0             | 9.9           | 0.36          | 0.40          | 0.44          |
| FeTi-N <sub>7.4%</sub> | 0.71                    | 0.3261        | 6.6           | 0.41          | 0.51          | 0.55          |
|                        | Clustered N             |               |               |               |               |               |
| FeTi-N <sub>3.7%</sub> | 1.21                    | 0.0101        | 10.8          | 0.35          | 0.39          | 0.41          |
| FeTi-N <sub>5.5%</sub> | 1.25                    | 0.0175        | 11.1          | 0.36          | 0.38          | 0.39          |
| FeTi-N <sub>7.4%</sub> | 0.64                    | 0.0049        | 4.5           | 0.53          | 0.54          | 0.55          |

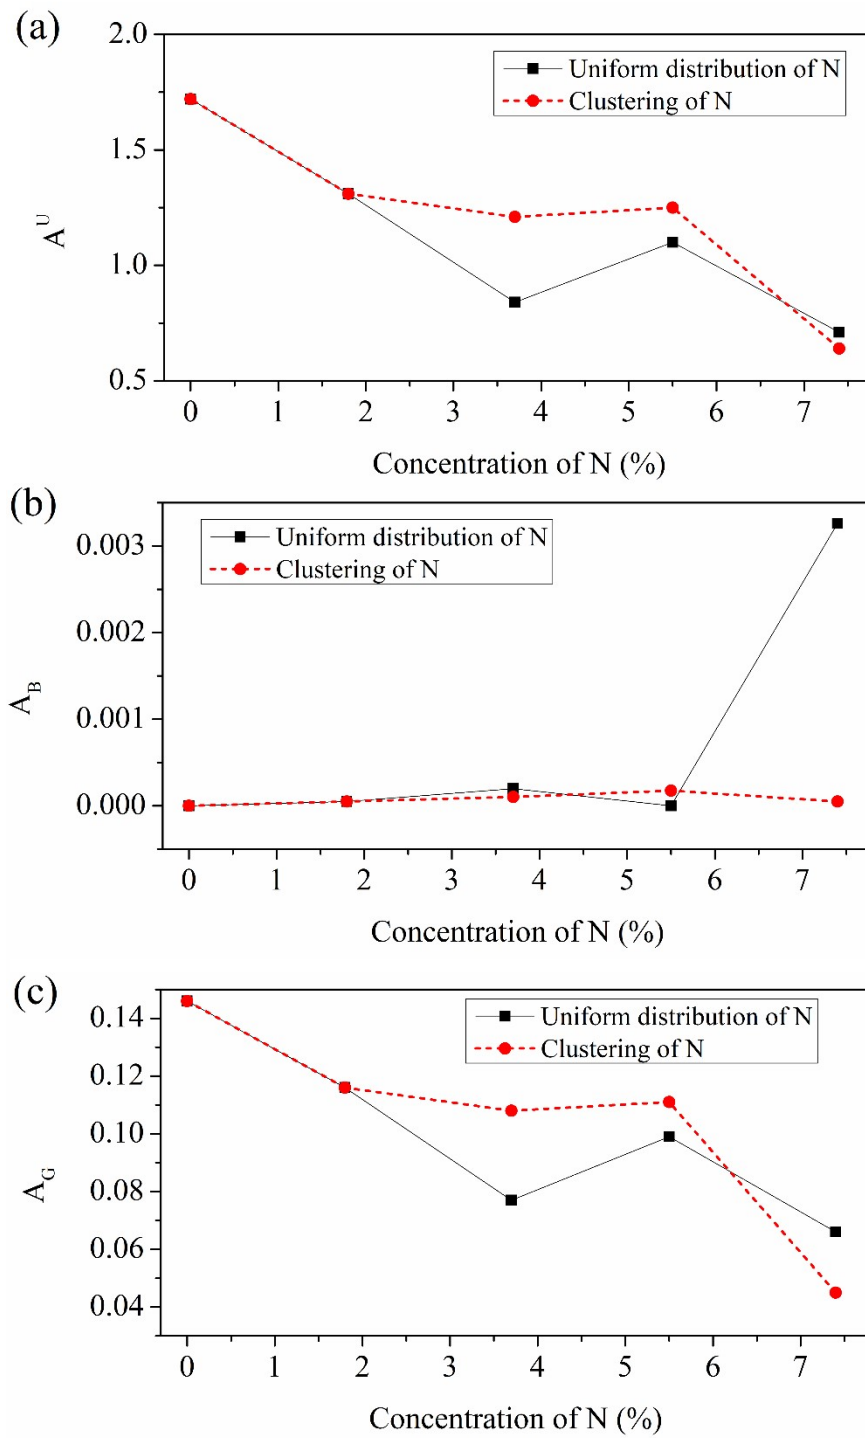

**Fig. S1.** (a)  $A^U$ , (b)  $A_B$ , and (c)  $A_G$  as a function of the nitrogen concentration in FeTi.

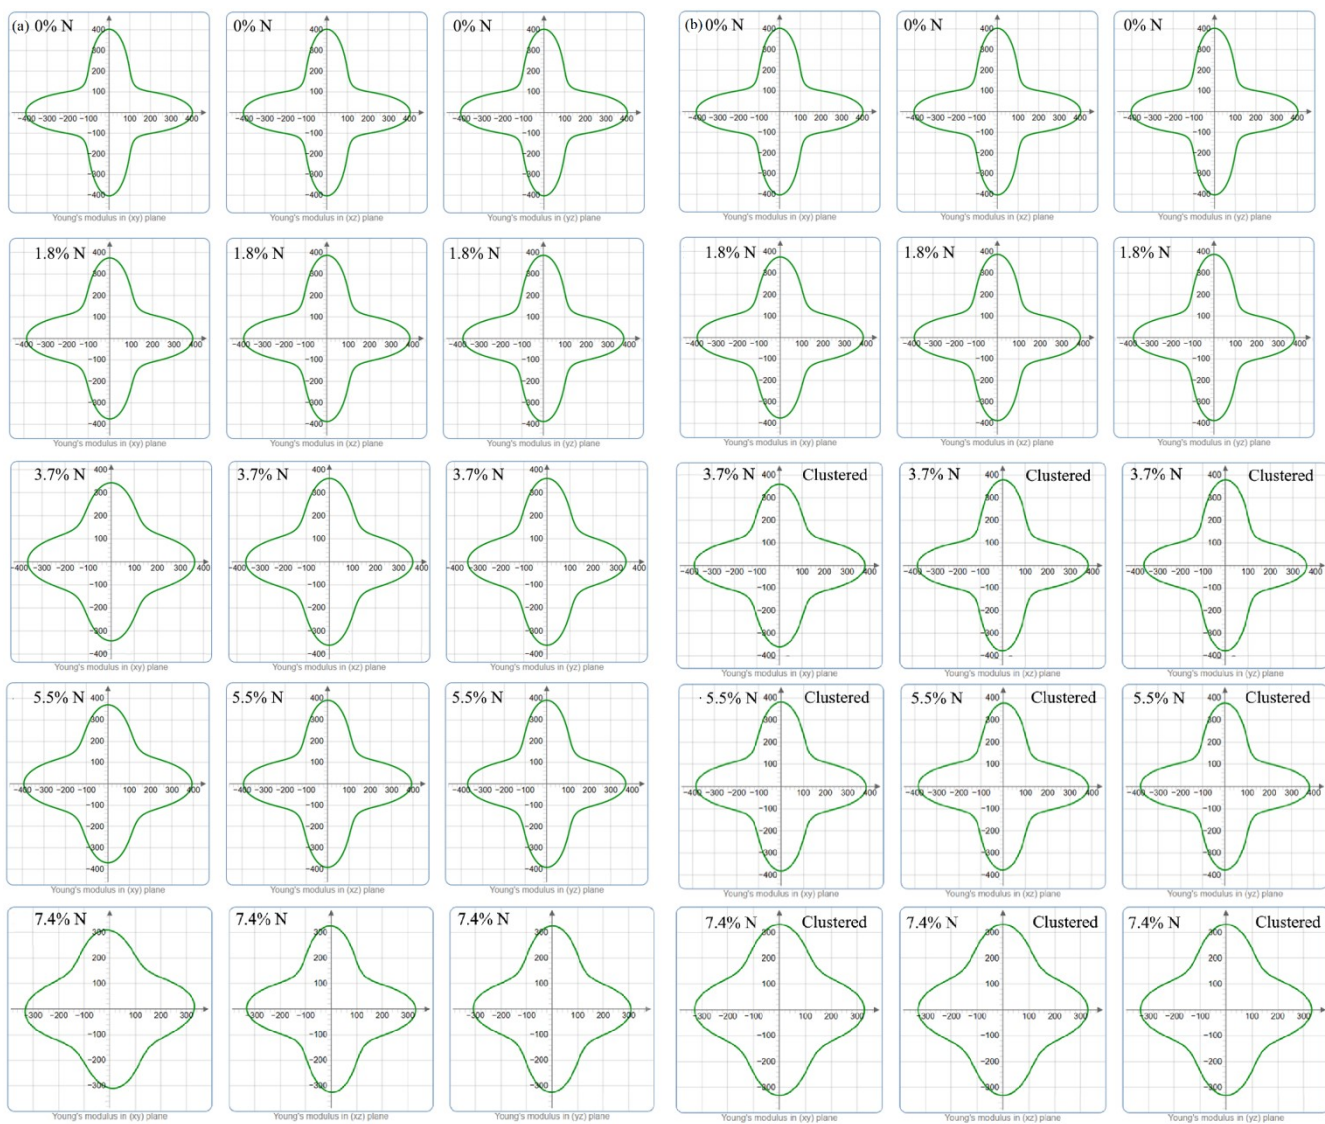

**Fig. S2.** The projections of linear compressibility of the FeTi supercell containing uniformly distributed and clustered N.

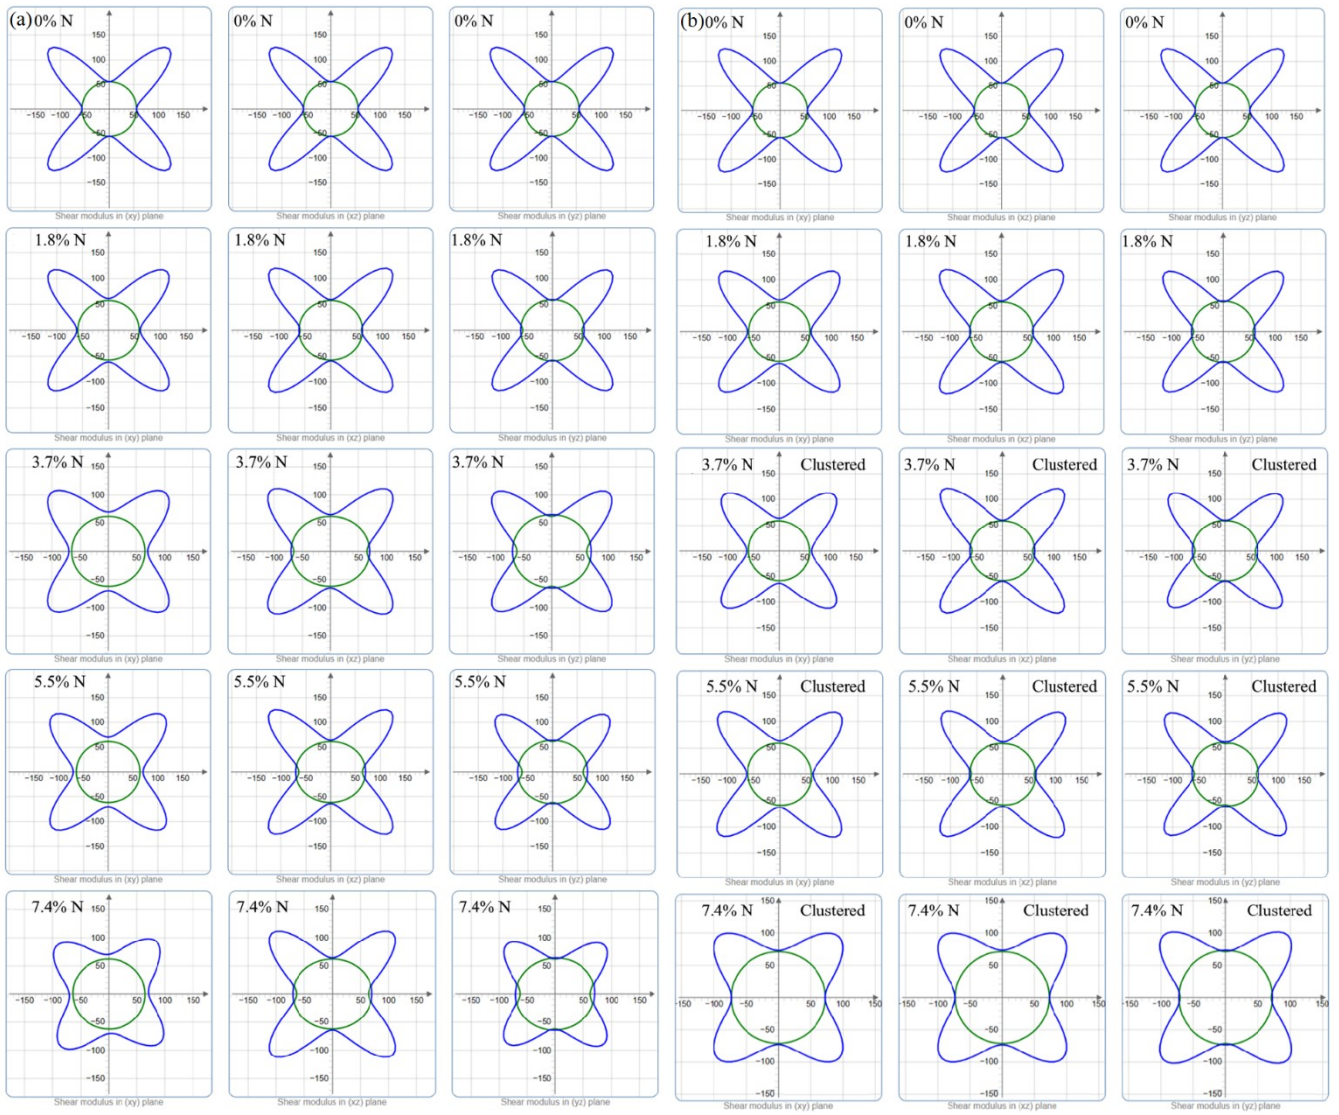

**Fig. S3.** The projections of Young's modulus of FeTi containing (a) uniformly distributed and (b) clustered N.



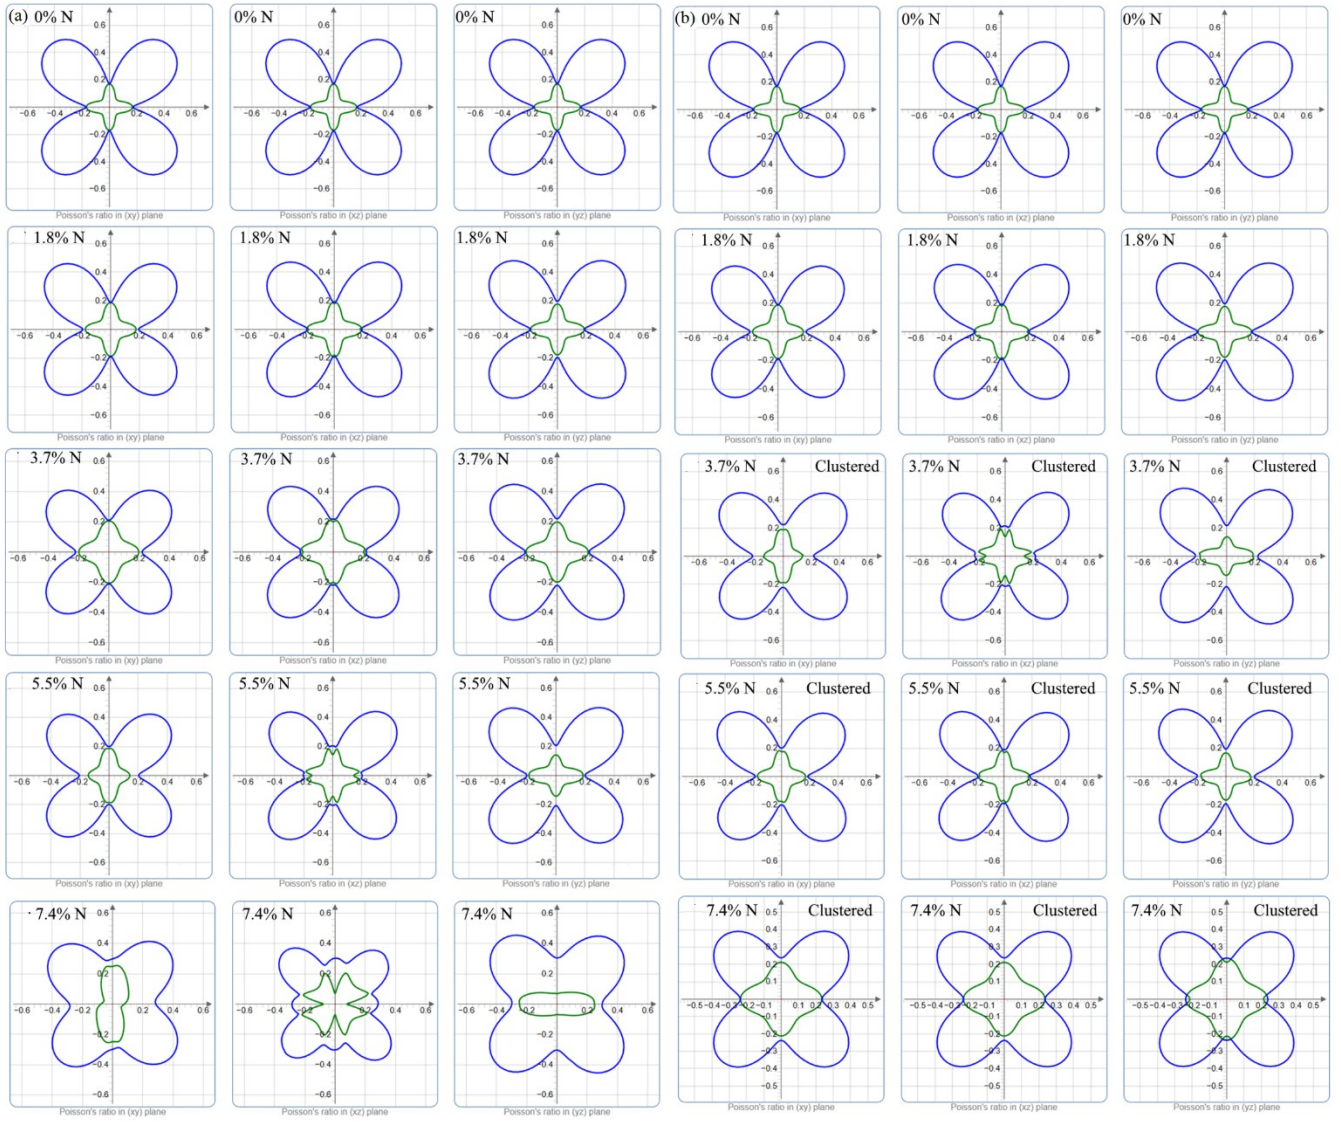

**Fig. S4.** The projections of shear moduli of FeTi containing (a) uniformly distributed and (b) clustered N.

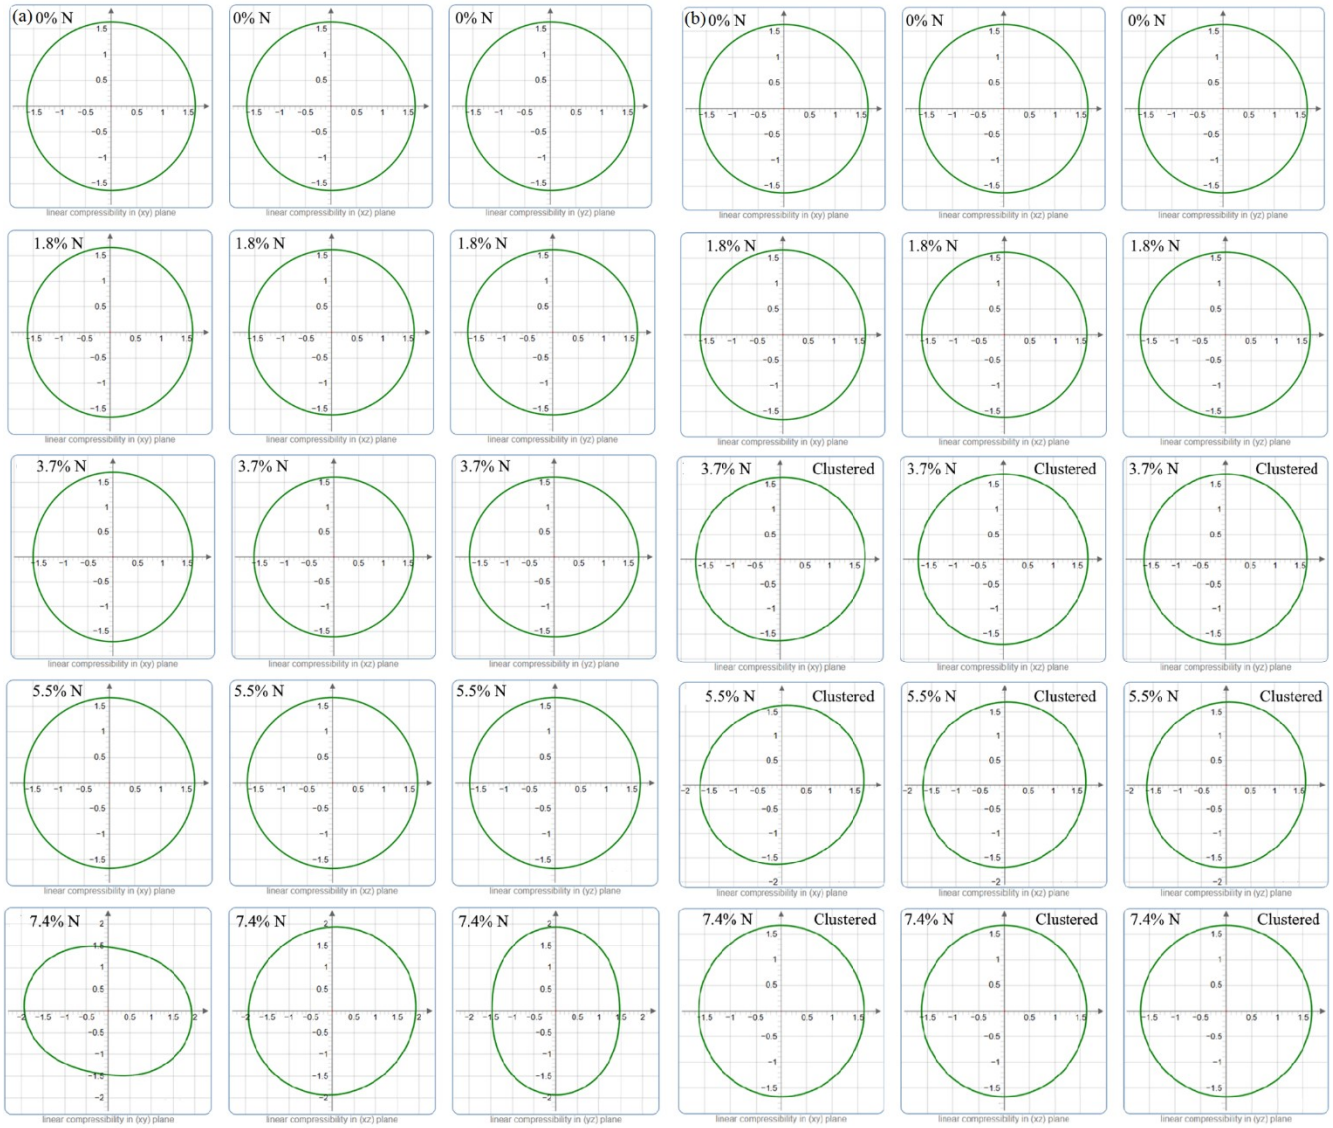

**Fig. S5.** The projections of Poisson's ratio of the FeTi supercell containing uniformly distributed and clustered N.

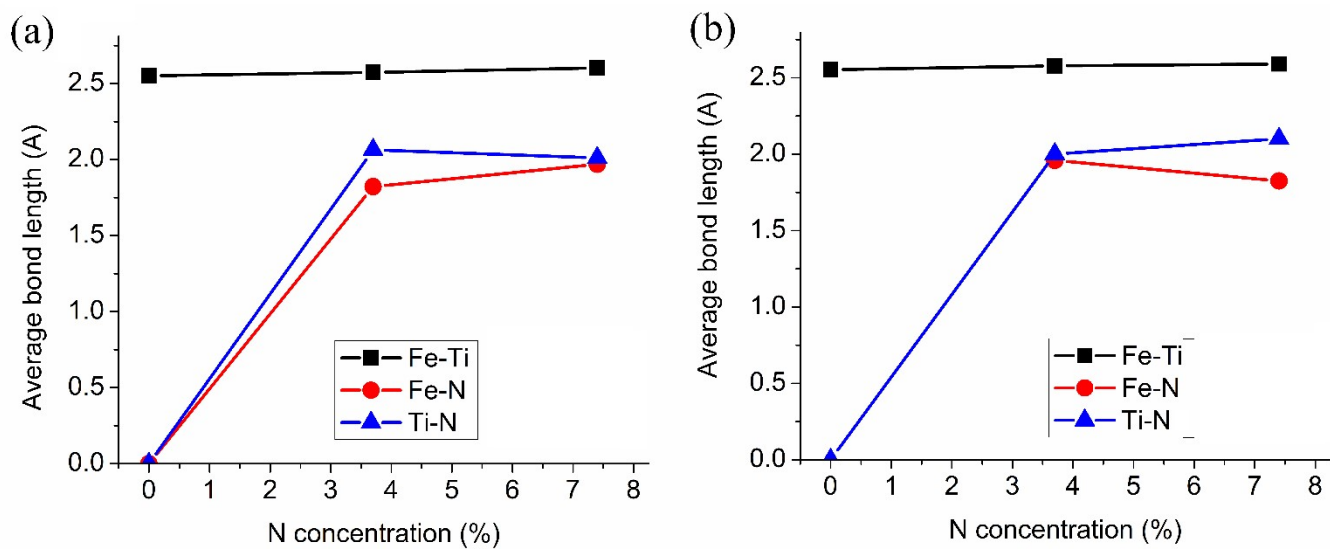

**Fig. S6.** The average Fe-Ti, Fe-N, and Ti-N bond length in the FeTi supercell containing (a) uniformly distributed and (b) clustered N.
